# Supplementary material for: Developing a Theory-based Health Education Intervention to Prevent Adolescent Students from Smokeless Tobacco Consumption
Source: Research Square preprint supplement (doi:10.21203/rs.3.rs-6891275/v1), 2025-07-15
Supplement: Supplementary file [file 81c38ab7cc09a66a40eb0b1d.pdf]

## Questionnaire to Assess Reliability of Health Education Intervention

**Sex:**

**Age:**

**Class:**

To what extent do you agree or disagree with the following statements? Please, circle any one of the numbers based on your experiences during the sessions of intervention.

[Strongly disagree (SD) = 1; Disagree (D) = 2; Neutral (N) = 3; Agree (A) = 4; Strongly agree (SA) = 5]

| S. No. | Statements                                                                  | SD | D | N | A | SA |
|--------|-----------------------------------------------------------------------------|----|---|---|---|----|
| 1.     | I can introduce SLT.                                                        | 1  | 2 | 3 | 4 | 5  |
| 2.     | I can define SLT.                                                           | 1  | 2 | 3 | 4 | 5  |
| 3.     | I can describe SLT.                                                         | 1  | 2 | 3 | 4 | 5  |
| 4.     | I can classify different types of SLT products.                             | 1  | 2 | 3 | 4 | 5  |
| 5.     | I can explain different types of SLT products.                              | 1  | 2 | 3 | 4 | 5  |
| 6.     | I can give examples of different types of SLT.                              | 1  | 2 | 3 | 4 | 5  |
| 7.     | I can list name of chemicals found in SLT.                                  | 1  | 2 | 3 | 4 | 5  |
| 8.     | I can explain chemicals found in SLT.                                       | 1  | 2 | 3 | 4 | 5  |
| 9.     | I can tell the names of most cancerous chemicals found in SLT.              | 1  | 2 | 3 | 4 | 5  |
| 10.    | I can describe the prevalence of SLT consumption in the world.              | 1  | 2 | 3 | 4 | 5  |
| 11.    | I can explain the prevalence of SLT consumption among adolescents.          | 1  | 2 | 3 | 4 | 5  |
| 12.    | I can share facts related to the prevalence of SLT consumption with others. | 1  | 2 | 3 | 4 | 5  |
| 13.    | I can describe short-term effects of SLT consumption.                       | 1  | 2 | 3 | 4 | 5  |
| 14.    | I can list short-term effects of SLT consumption.                           | 1  | 2 | 3 | 4 | 5  |
| 15.    | I can share short-term effects of SLT consumption with others.              | 1  | 2 | 3 | 4 | 5  |
| 16.    | I can describe long-term effects of SLT consumption.                        | 1  | 2 | 3 | 4 | 5  |
| 17.    | I can list long-term effects of SLT consumption.                            | 1  | 2 | 3 | 4 | 5  |
| 18.    | I can share long-term effects of SLT consumption with others.               | 1  | 2 | 3 | 4 | 5  |

| S. No. | Statements                                                                                                  | SD | D | N | A | SA |
|--------|-------------------------------------------------------------------------------------------------------------|----|---|---|---|----|
| 19.    | I can describe the proportion of mortality attributed to tobacco use.                                       | 1  | 2 | 3 | 4 | 5  |
| 20.    | I can explain the mortality caused by tobacco consumption in a year.                                        | 1  | 2 | 3 | 4 | 5  |
| 21.    | I can share the facts related to the proportion of mortality attributed to tobacco consumption with others. | 1  | 2 | 3 | 4 | 5  |
| 22.    | I can tell the name of chemical responsible for addiction of SLT.                                           | 1  | 2 | 3 | 4 | 5  |
| 23.    | I can describe how the consumption of SLT leads to its addiction.                                           | 1  | 2 | 3 | 4 | 5  |
| 24.    | I can share why we get addicted to SLT with others.                                                         | 1  | 2 | 3 | 4 | 5  |
| 25.    | I can describe probable hazards of SLT consumption.                                                         | 1  | 2 | 3 | 4 | 5  |
| 26.    | I can list probable hazards of SLT consumption.                                                             | 1  | 2 | 3 | 4 | 5  |
| 27.    | I can share probable hazards of SLT consumption with others.                                                | 1  | 2 | 3 | 4 | 5  |
| 28.    | I can describe positive aspects of not consuming SLT.                                                       | 1  | 2 | 3 | 4 | 5  |
| 29.    | I can list positive aspects of not consuming SLT.                                                           | 1  | 2 | 3 | 4 | 5  |
| 30.    | I can share positive aspects of not consuming SLT with others.                                              | 1  | 2 | 3 | 4 | 5  |
| 31.    | I can describe misconceptions related to intrinsic rewards of SLT consumption.                              | 1  | 2 | 3 | 4 | 5  |
| 32.    | I can list misconceptions related to intrinsic rewards of SLT consumption.                                  | 1  | 2 | 3 | 4 | 5  |
| 33.    | I can share misconceptions related to intrinsic rewards of SLT consumption with others.                     | 1  | 2 | 3 | 4 | 5  |
| 34.    | I can describe misconceptions related to extrinsic rewards of SLT consumption.                              | 1  | 2 | 3 | 4 | 5  |
| 35.    | I can list misconceptions related to extrinsic rewards of SLT consumption.                                  | 1  | 2 | 3 | 4 | 5  |
| 36.    | I can share misconceptions related to extrinsic rewards of SLT consumption with others.                     | 1  | 2 | 3 | 4 | 5  |

| S. No. | Statements                                                                                 | SD | D | N | A | SA |
|--------|--------------------------------------------------------------------------------------------|----|---|---|---|----|
| 37.    | I can describe misconceptions related to the cost paid for not consuming SLT.              | 1  | 2 | 3 | 4 | 5  |
| 38.    | I can list misconceptions related to the cost paid for not consuming SLT.                  | 1  | 2 | 3 | 4 | 5  |
| 39.    | I can share misconceptions related to the cost paid for not consuming SLT with others.     | 1  | 2 | 3 | 4 | 5  |
| 40.    | I can describe positive and negative norms related to SLT consumption.                     | 1  | 2 | 3 | 4 | 5  |
| 41.    | I can differentiate positive and negative norms related to SLT consumption.                | 1  | 2 | 3 | 4 | 5  |
| 42.    | I can share positive and negative norms related to SLT consumption with others.            | 1  | 2 | 3 | 4 | 5  |
| 43.    | I can describe preventing measures of SLT Consumption.                                     | 1  | 2 | 3 | 4 | 5  |
| 44.    | I can list preventive measures of SLT consumption.                                         | 1  | 2 | 3 | 4 | 5  |
| 45.    | I can share preventive measures of SLT consumption with others.                            | 1  | 2 | 3 | 4 | 5  |
| 46.    | I can list prescribed behaviors that prevent SLT consumption.                              | 1  | 2 | 3 | 4 | 5  |
| 47.    | I am able to describe the importance of prescribed behaviors that prevent SLT consumption. | 1  | 2 | 3 | 4 | 5  |
| 48.    | I can share prescribed behaviors that prevent SLT consumption with others.                 | 1  | 2 | 3 | 4 | 5  |
| 49.    | I can introduce decision-making.                                                           | 1  | 2 | 3 | 4 | 5  |
| 50.    | I can define what decision-making is.                                                      | 1  | 2 | 3 | 4 | 5  |
| 51.    | I can explain decision-making, linking it with SLT consumption.                            | 1  | 2 | 3 | 4 | 5  |
| 52.    | I can describe the steps of decision-making.                                               | 1  | 2 | 3 | 4 | 5  |
| 53.    | I can list the steps of decision-making.                                                   | 1  | 2 | 3 | 4 | 5  |

| S. No. | Statements                                                                              | SD | D | N | A | SA |
|--------|-----------------------------------------------------------------------------------------|----|---|---|---|----|
| 54.    | I can explain the steps of decision-making regarding SLT consumption.                   | 1  | 2 | 3 | 4 | 5  |
| 55.    | I am able to act upon the steps of decision-making.                                     | 1  | 2 | 3 | 4 | 5  |
| 56.    | I am able to demonstrate the steps of decision-making regarding not consuming SLT.      | 1  | 2 | 3 | 4 | 5  |
| 57.    | I am able to apply the steps of decision-making regarding not consuming SLT in my life. | 1  | 2 | 3 | 4 | 5  |
| 58.    | I can describe peer pressure.                                                           | 1  | 2 | 3 | 4 | 5  |
| 59.    | I can give examples of peer pressure related to SLT consumption.                        | 1  | 2 | 3 | 4 | 5  |
| 60.    | I can share what is peer pressure with others.                                          | 1  | 2 | 3 | 4 | 5  |
| 61.    | I can describe ways of managing peer pressure.                                          | 1  | 2 | 3 | 4 | 5  |
| 62.    | I can explain ways of managing peer pressure, linking it with SLT consumption.          | 1  | 2 | 3 | 4 | 5  |
| 63.    | I can share ways of managing peer pressure with others.                                 | 1  | 2 | 3 | 4 | 5  |
| 64.    | I am able to demonstrate how to manage measures of peer pressure.                       | 1  | 2 | 3 | 4 | 5  |
| 65.    | I am able to manage peer pressure regarding SLT consumption.                            | 1  | 2 | 3 | 4 | 5  |
| 66.    | I am able to act upon steps of managing peer pressure.                                  | 1  | 2 | 3 | 4 | 5  |
| 67.    | I can describe ways of saying "No" to peer proposals of SLT consumption.                | 1  | 2 | 3 | 4 | 5  |
| 68.    | I can list different types of saying "No" to peer proposals of SLT consumption.         | 1  | 2 | 3 | 4 | 5  |
| 69.    | I can explain different types of saying "No" to peer proposals of SLT consumption.      | 1  | 2 | 3 | 4 | 5  |
| 70.    | I am able to demonstrate how to say "No" to peer proposals of SLT consumption.          | 1  | 2 | 3 | 4 | 5  |
| 71.    | I am able to say "No" to peer proposals of SLT consumption.                             | 1  | 2 | 3 | 4 | 5  |

| S. No.                                                                        | Statements                                                                                         | SD | D | N | A | SA |
|-------------------------------------------------------------------------------|----------------------------------------------------------------------------------------------------|----|---|---|---|----|
| 72.                                                                           | I am able to apply different types of saying "No" to peer proposals of SLT consumption in my life. | 1  | 2 | 3 | 4 | 5  |
| <b>Questionnaire to Assess Face Validity of Health Education Intervention</b> |                                                                                                    |    |   |   |   |    |
| 1.                                                                            | The contents of the sessions were clear and understandable.                                        | 1  | 2 | 3 | 4 | 5  |
| 2.                                                                            | The contents of the sessions were useful to meet the needs of students.                            | 1  | 2 | 3 | 4 | 5  |
| 3.                                                                            | The contents of the sessions met the learning standard of students.                                | 1  | 2 | 3 | 4 | 5  |
| 4.                                                                            | The teaching materials used in the sessions were clear and readable.                               | 1  | 2 | 3 | 4 | 5  |
| 5.                                                                            | The teaching-learning activities of the sessions were appropriate to meet the needs of students.   | 1  | 2 | 3 | 4 | 5  |
| 6.                                                                            | The teaching-learning activities of the sessions created the opportunity for active learning.      | 1  | 2 | 3 | 4 | 5  |
| 7.                                                                            | The time allocated for each session was appropriate.                                               | 1  | 2 | 3 | 4 | 5  |

Thank you!
