# Supplementary material for: Developing a Theory-based Health Education Intervention to Prevent Adolescent Students from Smokeless Tobacco Consumption
Source: Research Square preprint supplement (doi:10.21203/rs.3.rs-6891275/v1), 2025-07-15
Supplement: Supplementary file [file d6b663c9ec123f0292b8e99d.pdf]

## **Guidelines for Focus Group Discussion**

Needs assessment for developing Health Education Intervention

Time:

Place:

Date:

Facilitator/Interviewer:

Participants/Interviewee:

[Brief introduction of study- purpose, process, ethical concerns]

- Briefly describe what tobacco/smokeless tobacco is. (Introduction, different types of smokeless tobacco, prevalence of smokeless tobacco)
- Which chemicals are found in smokeless tobacco? (Addictive, Cancerous)
- What are the effects of smokeless tobacco consumption? (Short-term effects, long-term effects, mortality attributed to tobacco use)
- What are the probable hazards of smokeless tobacco consumption? (Being addicted, being sick, early death, benefit of not consuming smokeless tobacco)
- What types of rewards do students think they achieve from smokeless tobacco consumption? (Intrinsic rewards such as feeling of pleasure, reduction of tension, having mood fresh; Extrinsic rewards such as having more friends, looking smart, increase social relationship)
- What do people have to pay if they refuse peer proposals of smokeless tobacco consumption? (If not consumed- forced to leave group, being angry, abusing, threatening)
- How would smokeless tobacco consumption among students be prevented? (awareness programs, rule-regulations, alternative healthy behaviors)
- Why are life skills necessary to prevent students from smokeless tobacco consumption? (Decision-making, saying 'No' to peer proposals of smokeless tobacco, managing peer pressure)

Thank you!
